# Supplementary material for: Membrane Vesicles of Pectobacterium as an Effective Protein Secretion System
Source: MDPI journal article supplement (doi:10.3390/ijms222212574), 2021-11-22
Supplement: s1 [file s1]

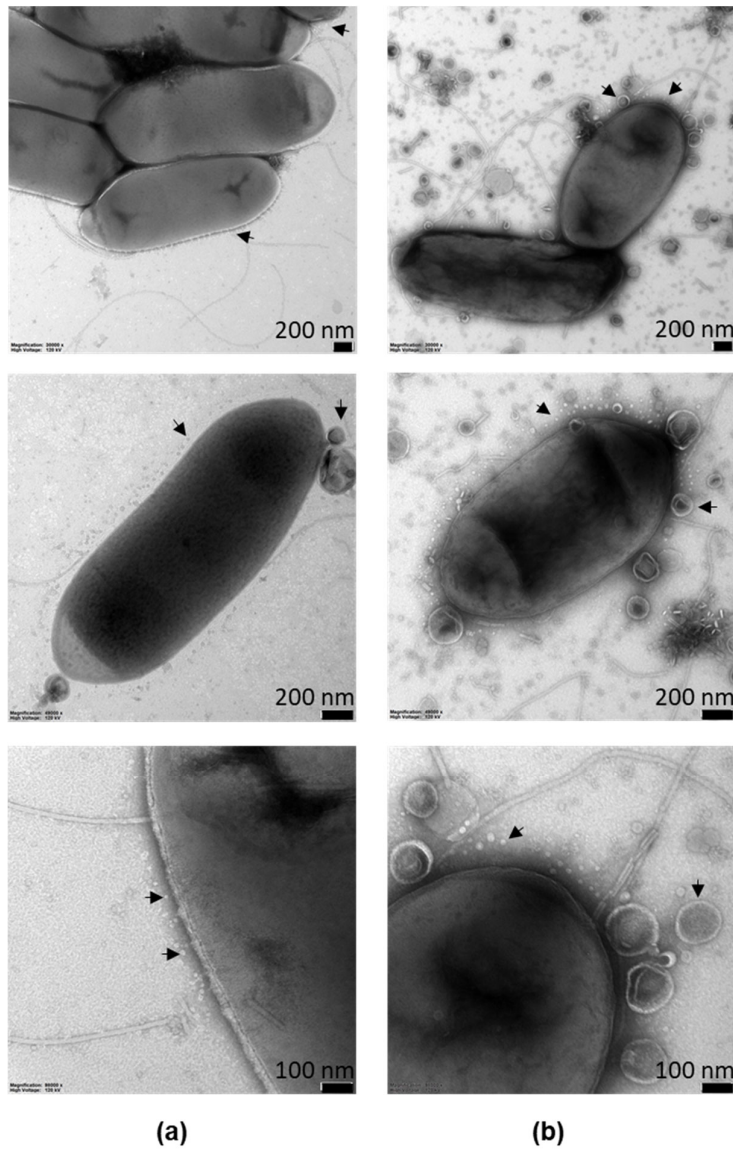

**Figure S1.** TEM images of *P. zantedeschiae* 9M bacteria grown on (a) the MH agar supplemented with 10% sucrose, and (b) the CVP agar plates. MVs are indicated by arrows. The size bar is 200 nm or 100 nm (bottom images).

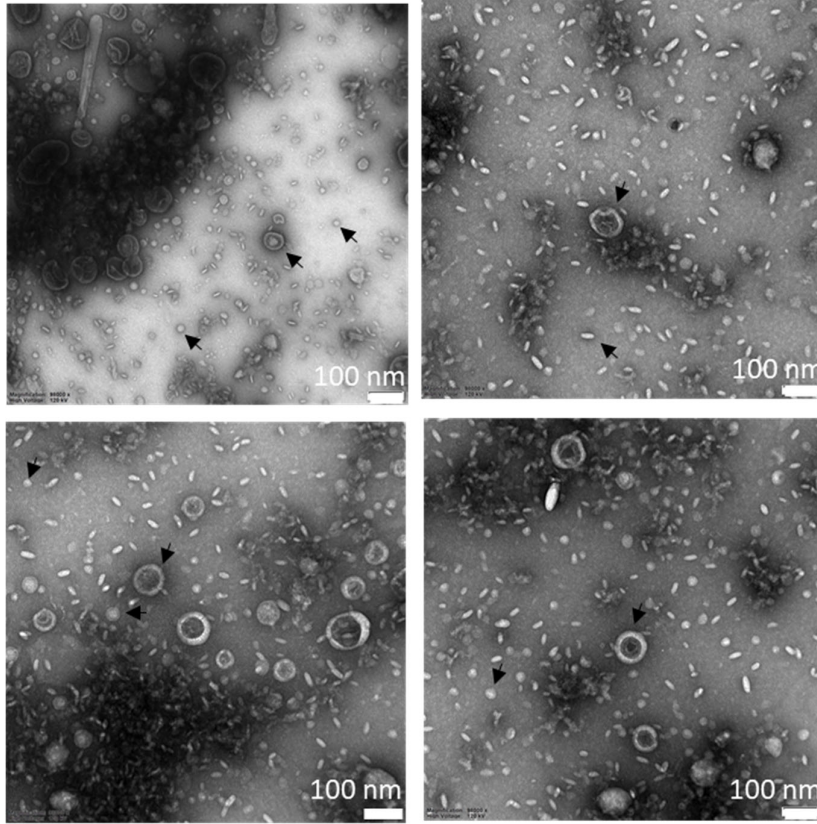

**Figure S2.** TEM images of the MVs produced by *P. zantedeschiae* 9M in the liquid M63 medium supplemented with 0.2% glycerol and 0.4% PGA. MVs are indicated by arrows. The size bar is 100 nm.

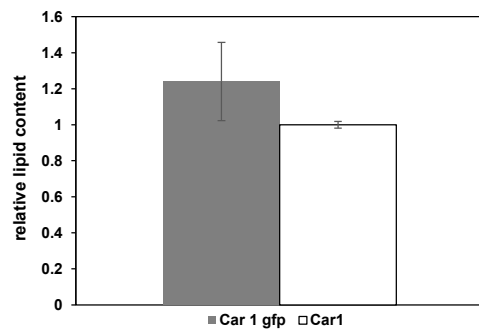

**Figure S3.** The relative lipid content of the MVs from the GFP-tagged *P. odoriferum* Car1 and the wild-type strain assessed by the DPH method. The obtained results were expressed as relative to the MVs derived from the wild-type strain. The data represent one of two reproducible experiments, expressed as mean ± SEM. Statistical significance was calculated using Student's t test ( $P < 0.05$ ).

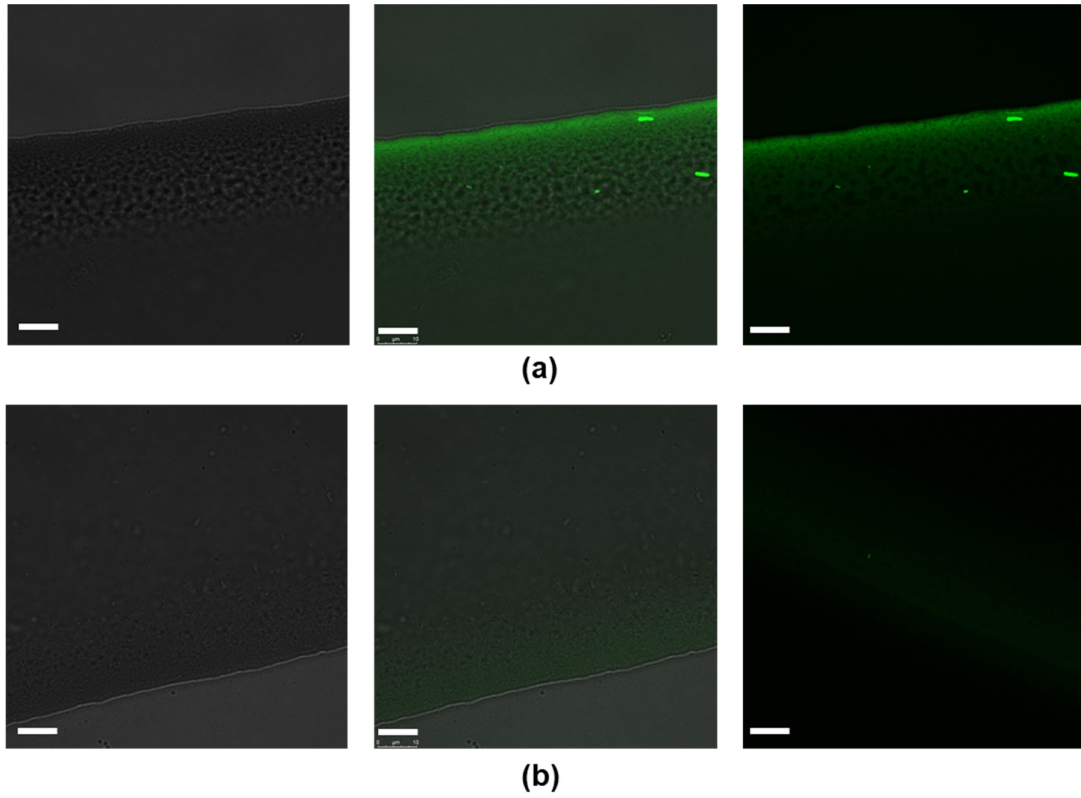

**Figure S4.** Confocal fluorescence microscopy images of the MVs from (a) the GFP-tagged *P. zantedeschiae* 9M and (b) the wild-type strain. From the left: transmitted light, merge, GFP fluorescence. The microscopic image is depicting a droplet of concentrated MVs on a microscopic slide. The MVs can be observed cumulating on the droplet edges, where the most intense fluorescence occurs. This effect does not occur for the wild-type strain, as depicted. The size bar is 10 μm.

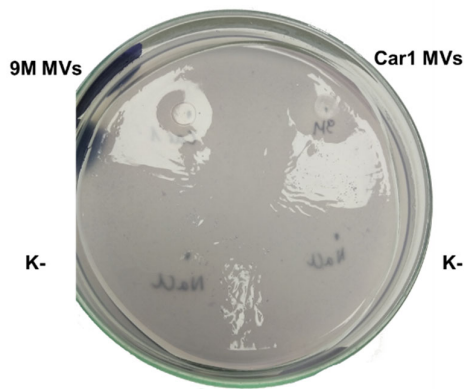

**Figure S5.** Representative results of the pectinase plate test on the CVP agar for the MVs derived from *P. zantedeschiae* 9M and *P. odoriferum* Car1. The formation of cavities indicates pectate degradation. Negative control systems contained PBS instead of the MVs suspension.

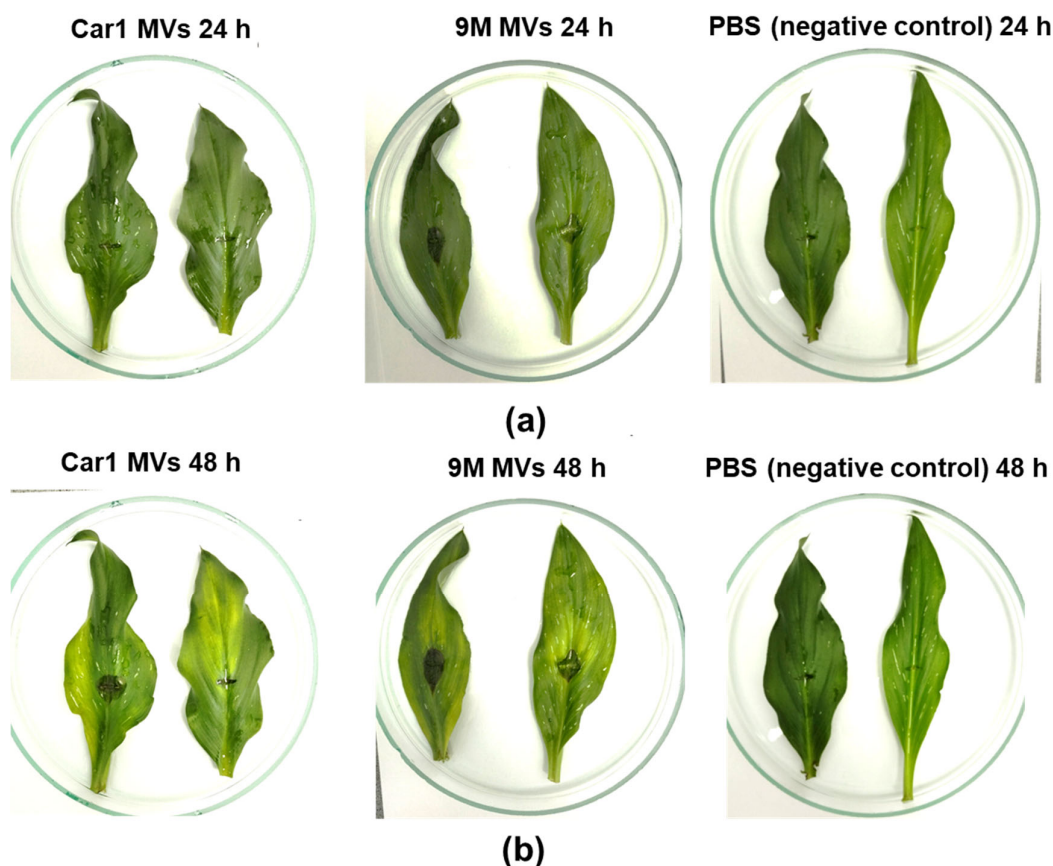

**Figure S6.** Representative images of the plant pathogenicity test on Calla lily leaves. Wounded lesions were made across the leaves with a pipette tip. The lesions were inoculated with the MVs derived from *P. zantedeschiae* 9M or *P. odoriferum* Car1. In the negative control, PBS was used instead of the MVs suspension. Maceration of the plant tissue was assessed after (a) 24 hours and (b) 48 hours of incubation.

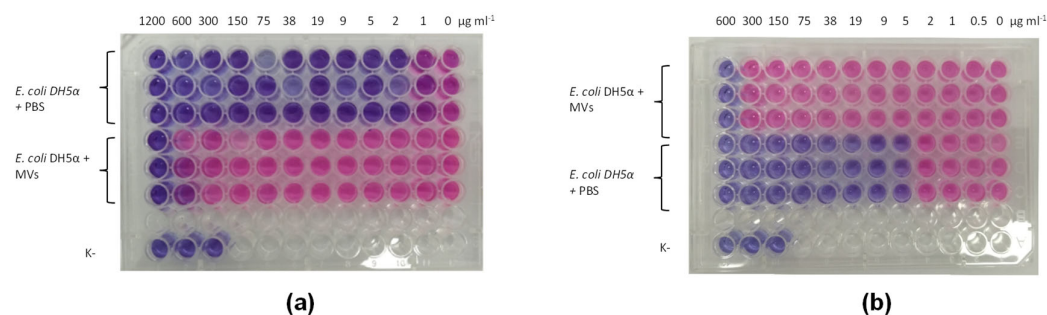

**Figure S7.** The MIC assay of ampicillin for *E. coli* DH5 $\alpha$  in the presence of the MVs from ampicillin resistant (a) *P. odoriferum* Car 1 gfp and (b) *P. versatilis* DPMP190 strains. The growth of ampicillin susceptible *E. coli* DH5 $\alpha$  was compared in the MH medium containing the MVs or PBS, and increasing concentrations of ampicillin. The negative controls (K-) contained the MVs with no bacteria added. Ampicillin concentrations ( $\mu\text{g ml}^{-1}$ ) are indicated above the microtiter plates images. The growth of bacteria was assessed with the resazurin assay. A pink colour indicates bacterial growth.

**Table S1.** The proteomic analysis of the MVs derived from the wild-type *P. zantedeschiae* 9M and the GFP-tagged strain. The wild-type strain was cultured in two different media, the M63 medium supplemented with 0.2% glycerol and 0.4% PGA and the M63 medium supplemented with 0.2% glycerol and 10% potato extract. The GFP-

tagged *P. zantedeschiae* 9M strain was grown in the M63 medium supplemented with 0.2% glycerol and 0.4% PGA.

| UniProt entry name   | Protein names                                                                                  | Gene name  | # peptides<br>9M M63<br>0.2% glycerol<br>0.4% PGA | # peptides<br>9M gfp<br>M63 0.2% glycerol<br>0.4% PGA | # peptides<br>9M M63<br>0.2% glycerol<br>10% potato extract |
|----------------------|------------------------------------------------------------------------------------------------|------------|---------------------------------------------------|-------------------------------------------------------|-------------------------------------------------------------|
| cytoplasmic proteins |                                                                                                |            |                                                   |                                                       |                                                             |
| A0A093RT18           | Cysteine synthase (EC 2.5.1.47)                                                                | KP22_08815 | 20                                                | 13                                                    | 4                                                           |
| A0A093RW32           | Serine/threonine protein kinase                                                                | KP22_04685 | 32                                                | 0                                                     | 0                                                           |
| A0A093SVG4           | Sulfite reductase [NADPH] hemoprotein beta-component (SiR-HP) (SiRHP) (EC 1.8.1.2)             | cysI       | 10                                                | 5                                                     | 0                                                           |
| A0A093T2V1           | Pyruvate dehydrogenase E1 component (EC 1.2.4.1)                                               | aceE       | 40                                                | 28                                                    | 1                                                           |
| A0A093UI17           | Ribonuclease E (RNase E) (EC 3.1.26.12)                                                        | rne        | 19                                                | 9                                                     | 0                                                           |
| A0A094U8G7           | Chaperone protein ClpB                                                                         | clpB       | 25                                                | 16                                                    | 1                                                           |
| A0A0H3I270           | Ferritin (EC 1.16.3.2)                                                                         | W5S_2068   | 8                                                 | 3                                                     | 0                                                           |
| A0A0H3IF76           | Ribokinase (RK) (EC 2.7.1.15)                                                                  | rbsK       | 7                                                 | 0                                                     | 2                                                           |
| A0A0J5XQF8           | Protein translocase subunit SecA                                                               | secA       | 17                                                | 14                                                    | 0                                                           |
| A0A0J5XRY1           | 2-deoxy-D-gluconate 3-dehydrogenase                                                            | G033_11980 | 9                                                 | 4                                                     | 0                                                           |
| A0A0J5XTP8           | Phosphoserine aminotransferase (EC 2.6.1.52) (Phosphohydroxythreonine aminotransferase) (PSAT) | serC       | 10                                                | 5                                                     | 0                                                           |
| A0A0J5XVV4           | Pyruvate kinase (EC 2.7.1.40)                                                                  | G033_09265 | 16                                                | 10                                                    | 0                                                           |
| A0A0J5XY19           | Acetate kinase (EC 2.7.2.1) (Acetokinase)                                                      | ackA       | 12                                                | 3                                                     | 0                                                           |

|            |                                                                                                                                                                     |             |    |    |    |
|------------|---------------------------------------------------------------------------------------------------------------------------------------------------------------------|-------------|----|----|----|
| A0A1D7YYA3 | Threonine synthase (EC 4.2.3.1)                                                                                                                                     | A7983_04370 | 11 | 5  | 0  |
| A0A1D7Z3M3 | Phosphoribosylaminoimidazole-succinocarboxamide synthase (EC 6.3.2.6) (SAICAR synthetase)                                                                           | purC        | 12 | 3  | 0  |
| A0A1D7Z400 | Dihydrolipoyllysine-residue succinyltransferase component of 2-oxoglutarate dehydrogenase complex (EC 2.3.1.61) (2-oxoglutarate dehydrogenase complex component E2) | A7983_15280 | 10 | 6  | 1  |
| A0A1D7Z4G6 | DNA protection during starvation protein (EC 1.16.-.-)                                                                                                              | dps         | 9  | 0  | 0  |
| A0A1V2QZN7 | Glutamate--tRNA ligase (EC 6.1.1.17) (Glutamyl-tRNA synthetase) (GluRS)                                                                                             | gltX        | 9  | 4  | 0  |
| A0A221T5W1 | Peptidyl-prolyl cis-trans isomerase (EC 5.2.1.8)                                                                                                                    | fkIB        | 8  | 3  | 0  |
| A0A221T6S2 | Serine hydroxymethyltransferase (SHMT) (Serine methylase) (EC 2.1.2.1)                                                                                              | glyA        | 19 | 10 | 1  |
| A0A221TEZ4 | Elongation factor Tu (EF-Tu)                                                                                                                                        | tufB        | 30 | 25 | 14 |
| A0A2T3VSS6 | Glutamate synthase large subunit                                                                                                                                    | C9I36_19205 | 31 | 27 | 0  |
| A0A2T3VSW9 | Oligogalacturonate lyase                                                                                                                                            | C9I36_18375 | 11 | 2  | 0  |
| A0A2T3VT49 | Isocitrate dehydrogenase [NADP] (EC 1.1.1.42)                                                                                                                       | C9I36_18440 | 23 | 5  | 0  |
| A0A2T3VUP3 | 60 kDa chaperonin (GroEL protein) (Protein Cpn60)                                                                                                                   | groL        | 40 | 34 | 17 |
| A0A3A4AJT7 | Acetyltransferase component of pyruvate dehydrogenase complex (EC 2.3.1.12)                                                                                         | D5074_04595 | 18 | 18 | 2  |
| A0A3S9XRA3 | Tryptophan synthase beta chain (EC 4.2.1.20)                                                                                                                        | trpB        | 8  | 8  | 0  |
| A0A3S9XXT4 | Ribose-phosphate pyrophosphokinase (RPPK)                                                                                                                           | prs         | 14 | 9  | 1  |

|            |                                                                                                                                                                                     |             |    |    |   |
|------------|-------------------------------------------------------------------------------------------------------------------------------------------------------------------------------------|-------------|----|----|---|
|            | (EC 2.7.6.1) (5-phospho-D-riboseyl alpha-1-diphosphate) (Phosphoribosyl diphosphate synthase) (Phosphoribosyl pyrophosphate synthase) (P-Rib-PP synthase) (PRPP synthase) (PRPPase) |             |    |    |   |
| A0A419AVX0 | 6,7-dimethyl-8-ribityllumazine synthase (DMRL synthase) (LS) (Lumazine synthase) (EC 2.5.1.78)                                                                                      | ribH        | 6  | 2  | 0 |
| A0A419AWZ3 | 6-phosphogluconate dehydrogenase, decarboxylating (EC 1.1.1.44)                                                                                                                     | gndA        | 20 | 11 | 1 |
| A0A426IYA4 | Protein-export protein SecB                                                                                                                                                         | secB        | 5  | 3  | 0 |
| A0A433NX46 | 10 kDa chaperonin (GroES protein) (Protein Cpn10)                                                                                                                                   | groES       | 7  | 4  | 2 |
| A0A4U7KAI5 | Dihydroxy-acid dehydratase (DAD) (EC 4.2.1.9)                                                                                                                                       | ilvD        | 19 | 7  | 0 |
| A0A4U7KAN1 | Elongation factor G (EF-G)                                                                                                                                                          | fusA        | 42 | 21 | 4 |
| A0A4U7KBF9 | Single-stranded DNA-binding protein (SSB)                                                                                                                                           | EDI29_17775 | 4  | 2  | 0 |
| A0A4U7KBS7 | DNA-directed RNA polymerase subunit beta' (RNAP subunit beta') (EC 2.7.7.6) (RNA polymerase subunit beta') (Transcriptase subunit beta')                                            | rpoC        | 45 | 41 | 1 |
| A0A4U7KD30 | Triosephosphate isomerase (TIM) (TPI) (EC 5.3.1.1) (Triose-phosphate isomerase)                                                                                                     | tpiA        | 9  | 5  | 1 |
| A0A4U7KGF4 | Formate C-acetyltransferase (EC 2.3.1.54)                                                                                                                                           | pflB        | 32 | 28 | 5 |
| A0A4U7KI77 | RNA-binding protein Hfq                                                                                                                                                             | hfq         | 6  | 7  | 0 |
| A0A4U7KJB5 | Elongation factor Ts (EF-Ts)                                                                                                                                                        | tsf         | 16 | 10 | 1 |
| A0A4U7KL15 | 2,3-bisphosphoglycerate-dependent phosphoglycerate mutase (BPG-dependent PGAM) (PGAM)                                                                                               | gpmA        | 16 | 9  | 3 |



|            |                                                                                                                                                                                                                                |      |    |    |   |
|------------|--------------------------------------------------------------------------------------------------------------------------------------------------------------------------------------------------------------------------------|------|----|----|---|
|            | (Phosphoglyceromutase)<br>(dPGM) (EC 5.4.2.11)                                                                                                                                                                                 |      |    |    |   |
| A0A4U7KM11 | 2,3,4,5-tetrahydropyridine-2,6-dicarboxylate N-succinyltransferase (EC 2.3.1.117)<br>(Tetrahydrodipicolinate N-succinyltransferase) (THDP succinyltransferase) (THP succinyltransferase)<br>(Tetrahydropicolinate succinylase) | dapD | 5  | 4  | 0 |
| A0A4V6ESF5 | Uronate isomerase (EC 5.3.1.12) (Glucuronate isomerase) (Uronic isomerase)                                                                                                                                                     | uxaC | 17 | 3  | 0 |
| A0A4V6ESR5 | Translation initiation factor IF-3                                                                                                                                                                                             | infC | 6  | 2  | 0 |
| A0A518VGF4 | Transcription termination factor Rho (EC 3.6.4.-) (ATP-dependent helicase Rho)                                                                                                                                                 | rho  | 18 | 7  | 1 |
| A0A518VJU5 | Acyl carrier protein (ACP)                                                                                                                                                                                                     | acpP | 4  | 3  | 1 |
| A0A518VKN8 | 2-dehydro-3-deoxyphosphooctonate aldolase (EC 2.5.1.55) (3-deoxy-D-manno-octulosonic acid 8-phosphate synthase) (KDO-8-phosphate synthase) (KDO 8-P synthase) (KDOPS) (Phospho-2-dehydro-3-deoxyoctonate aldolase)             | kdsA | 12 | 3  | 0 |
| A0A518VMH5 | Succinate--CoA ligase [ADP-forming] subunit beta (EC 6.2.1.5) (Succinyl-CoA synthetase subunit beta) (SCS-beta)                                                                                                                | sucC | 15 | 7  | 0 |
| A0A518VNS1 | ATP-dependent RNA helicase DeaD (EC 3.6.4.13) (Cold-shock DEAD box protein A)                                                                                                                                                  | deaD | 12 | 3  | 0 |
| A0A518VQA4 | ATP synthase subunit alpha (EC 7.1.2.2) (ATP synthase F1                                                                                                                                                                       | atpA | 25 | 23 | 0 |



|            |                                                                                                                                                                 |             |    |    |   |
|------------|-----------------------------------------------------------------------------------------------------------------------------------------------------------------|-------------|----|----|---|
|            | sector subunit alpha) (F-ATPase subunit alpha)                                                                                                                  |             |    |    |   |
| A0A6P1RRD2 | Flavodoxin                                                                                                                                                      | fldA        | 4  | 1  | 0 |
| A0A6P1RSR9 | Aminotransferase (EC 2.6.1.-)                                                                                                                                   | EO763_12775 | 17 | 1  | 1 |
| A0A6P1RXT5 | Glycerol-3-phosphate dehydrogenase (EC 1.1.5.3)                                                                                                                 | EO763_20725 | 22 | 5  | 1 |
| A0A6P1RZH9 | ATP synthase subunit beta (EC 7.1.2.2) (ATP synthase F1 sector subunit beta) (F-ATPase subunit beta)                                                            | atpD        | 24 | 17 | 1 |
| A0A6P1RZJ5 | Phosphoglycerate kinase (EC 2.7.2.3)                                                                                                                            | pgk         | 24 | 10 | 2 |
| A0A6P1RZW4 | UPF0325 protein<br>GMX10_01590                                                                                                                                  | GMX10_01590 | 8  | 0  | 1 |
| A0A6P1SBS4 | Tryptophan synthase alpha chain (EC 4.2.1.20)                                                                                                                   | trpA        | 6  | 0  | 0 |
| C6D9B3     | Chemotaxis protein CheW                                                                                                                                         | PC1_2610    | 8  | 1  | 0 |
| C6D9P1     | PTS system, glucose subfamily, IIA subunit                                                                                                                      | PC1_0773    | 10 | 4  | 2 |
| C6DCC9     | Citrate synthase                                                                                                                                                | PC1_1231    | 11 | 7  | 0 |
| C6DCD7     | Succinate--CoA ligase [ADP-forming] subunit alpha (EC 6.2.1.5) (Succinyl-CoA synthetase subunit alpha) (SCS-alpha)                                              | sucD        | 9  | 1  | 0 |
| C6DF33     | 2-oxoglutarate reductase (EC 1.1.1.399) (EC 1.1.1.95) (D-3-phosphoglycerate dehydrogenase)                                                                      | PC1_3682    | 12 | 7  | 0 |
| C6DF74     | Histidine biosynthesis bifunctional protein HisB [Includes: Histidinol-phosphatase (EC 3.1.3.15); Imidazoleglycerol-phosphate dehydratase (IGPD) (EC 4.2.1.19)] | hisB        | 7  | 3  | 0 |
| C6DFH6     | Fructose-bisphosphate aldolase (FBP aldolase) (EC 4.1.2.13)                                                                                                     | PC1_3700    | 10 | 8  | 5 |

|        |                                                                                                                                          |          |    |    |   |
|--------|------------------------------------------------------------------------------------------------------------------------------------------|----------|----|----|---|
| C6DFS3 | DNA-directed RNA polymerase subunit alpha (RNAP subunit alpha) (EC 2.7.7.6) (RNA polymerase subunit alpha) (Transcriptase subunit alpha) | rpoA     | 15 | 13 | 1 |
| C6DJB6 | Universal stress protein                                                                                                                 | PC1_4201 | 6  | 0  | 1 |
| C6DJD5 | Glutamine synthetase (EC 6.3.1.2)                                                                                                        | PC1_4220 | 29 | 21 | 2 |
| C6DKK2 | Transcription termination/antitermination protein NusA                                                                                   | nusA     | 10 | 5  | 0 |
| GFP    | Green fluorescent protein                                                                                                                | GFP      | 2  | 16 | 0 |
| PURA   | Adenylosuccinate synthetase (AMPSase) (AdSS) (EC 6.3.4.4) (IMP--aspartate ligase)                                                        | purA     | 14 | 3  | 1 |
| Q6CZC6 | Branched-chain-amino-acid aminotransferase (BCAT) (EC 2.6.1.42)                                                                          | ilvE     | 12 | 1  | 0 |
| Q6D011 | Isocitrase (EC 4.1.3.1) (Isocitratase) (Isocitrate lyase)                                                                                | aceA     | 10 | 0  | 0 |
| Q6D088 | Fructose-bisphosphate aldolase (FBP aldolase) (EC 4.1.2.13)                                                                              | fbaA     | 13 | 9  | 4 |
| Q6D0I8 | Cell division protein FtsZ                                                                                                               | ftsZ     | 12 | 3  | 0 |
| Q6D3N0 | S-(hydroxymethyl)glutathione dehydrogenase (EC 1.1.1.284)                                                                                | adhC     | 8  | 5  | 0 |
| Q6D4J9 | Cold shock protein                                                                                                                       | ECA2391  | 6  | 3  | 2 |
| Q6D4R2 | DNA-binding protein                                                                                                                      | hns2     | 8  | 3  | 0 |
| Q6D635 | Phosphoenolpyruvate synthase (PEP synthase) (EC 2.7.9.2) (Pyruvate, water dikinase)                                                      | ppsA     | 14 | 2  | 0 |
| Q6D7N1 | Cold shock-like protein                                                                                                                  | cspE     | 5  | 3  | 3 |
| Q6DA37 | Aspartate ammonia-lyase (Aspartase) (EC 4.3.1.1)                                                                                         | aspA1    | 13 | 0  | 0 |

|                           |                                                         |                         |    |    |   |
|---------------------------|---------------------------------------------------------|-------------------------|----|----|---|
| Q6DAE3                    | Diacetyl reductase [(S)-acetoin forming] (EC 1.1.1.304) | budC                    | 7  | 0  | 2 |
| Q6DAL5                    | DNA-binding protein HU-alpha                            | hupA                    | 5  | 4  | 3 |
| Q9WXA0                    | Tail core protein                                       |                         | 2  | 6  | 0 |
| A0A1M5PBI9                | Chemotaxis protein CheA                                 | SAMN05444<br>147_105311 | 11 | 0  | 0 |
| A0A6I7DBL4                | 3,4-dihydroxy-2-butanone 4-phosphate synthase           | ribB                    | 4  | 0  | 0 |
| A0A6I7DFJ9                | DNA-directed RNA polymerase subunit beta                | rpoB                    | 59 | 36 | 1 |
| A0A6I7DH35                | Phosphoenolpyruvate-protein phosphotransferase          | ptsI                    | 25 | 14 | 0 |
| A0A6I7DQT6                | Bacterioferritin                                        | EH204_19515             | 6  | 3  | 1 |
| A0A6I7DRV9                | Aspartate-semialdehyde dehydrogenase                    | asd                     | 10 | 9  | 1 |
| <b>ribosomal proteins</b> |                                                         |                         |    |    |   |
| A0A249QAP7                | 50S ribosomal protein L2                                | rplB                    | 14 | 13 | 1 |
| A0A4U7KBP6                | 50S ribosomal protein L1                                | rplA                    | 9  | 8  | 4 |
| A0A4V6ERZ7                | 50S ribosomal protein L4                                | rplD                    | 12 | 7  | 1 |
| A0A518VGV9                | 30S ribosomal protein S7                                | rpsG                    | 11 | 7  | 2 |
| A0A518VGW1                | 50S ribosomal protein L22                               | rplV                    | 6  | 7  | 1 |
| A0A518VGW9                | 50S ribosomal protein L6                                | rplF                    | 10 | 8  | 2 |
| A0A518VGX4                | 50S ribosomal protein L16                               | rplP                    | 7  | 5  | 0 |
| A0A518VGX6                | 30S ribosomal protein S4                                | rpsD                    | 4  | 10 | 1 |
| A0A518VGX7                | 30S ribosomal protein S11                               | rpsK                    | 7  | 5  | 0 |
| A0A518VGY9                | 50S ribosomal protein L5                                | rplE                    | 13 | 12 | 3 |
| A0A518VGZ8                | 30S ribosomal protein S13                               | rpsM                    | 9  | 4  | 0 |
| A0A518VH32                | 30S ribosomal protein S3                                | rpsC                    | 11 | 8  | 1 |
| A0A518VH49                | 50S ribosomal protein L17                               | rplQ                    | 6  | 8  | 1 |
| A0A518VHP8                | 50S ribosomal protein L9                                | rplI                    | 11 | 5  | 2 |
| A0A518VHQ1                | 30S ribosomal protein S6                                | rpsF                    | 6  | 6  | 1 |

|                                      |                                                                                                  |                 |    |    |   |
|--------------------------------------|--------------------------------------------------------------------------------------------------|-----------------|----|----|---|
| A0A518VI99                           | 30S ribosomal protein S16                                                                        | rpsP            | 7  | 5  | 0 |
| A0A518VLA4                           | 30S ribosomal protein S1                                                                         | EGD00_1281<br>5 | 32 | 24 | 2 |
| A0A518VLM3                           | 50S ribosomal protein L25                                                                        | rplY            | 5  | 2  | 0 |
| A0A518VN54                           | 30S ribosomal protein S2                                                                         | rpsB            | 13 | 12 | 1 |
| A0A518VNT7                           | 50S ribosomal protein L21                                                                        | rplU            | 7  | 7  | 1 |
| A0A518VPK1                           | 50S ribosomal protein L13                                                                        | rplM            | 6  | 5  | 1 |
| A0A6P1S0U3                           | 50S ribosomal protein L10                                                                        | rplJ            | 8  | 7  | 3 |
| A0A6P1S3Q1                           | 50S ribosomal protein L3                                                                         | rplC            | 6  | 5  | 0 |
| C6DG57                               | 30S ribosomal protein S5                                                                         | rpsE            | 9  | 4  | 0 |
| RS9                                  | 30S ribosomal protein S9                                                                         | rpsI            | 9  | 8  | 2 |
| A0A6I7DRM6                           | 50S ribosomal protein L24                                                                        | rplX            | 6  | 5  | 0 |
| A0A518VPT6                           | 50S ribosomal protein L7/L12                                                                     | rplL            | 5  | 4  | 3 |
| <b>cytoplasmic membrane proteins</b> |                                                                                                  |                 |    |    |   |
| A0A093T1T7                           | Sulfite reductase [NADPH]<br>flavoprotein alpha-<br>component (SiR-FP) (EC<br>1.8.1.2)           | cysJ            | 10 | 13 | 0 |
| A0A093UEQ3                           | Succinate dehydrogenase<br>flavoprotein subunit (EC<br>1.3.5.1)                                  | sdhA            | 12 | 2  | 0 |
| A0A0H3I8G3                           | Cytochrome bd-I ubiquinol<br>oxidase subunit I<br>(Cytochrome d ubiquinol<br>oxidase, subunit I) | W5S_3085        | 5  | 2  | 1 |
| A0A0J5XNP0                           | Ribose import ATP-binding<br>protein RbsA (EC 7.5.2.7)                                           | rbsA            | 18 | 0  | 2 |
| A0A6P1RV12                           | Enoyl-[acyl-carrier-protein]<br>reductase [NADH] (EC<br>1.3.1.9)                                 | fabI            | 8  | 7  | 0 |
| C6DDF3                               | Lipoprotein                                                                                      | PC1_3344        | 12 | 10 | 0 |
| C6DJD4                               | 50S ribosomal subunit<br>assembly factor BipA (EC<br>3.6.5.-) (GTP-binding protein<br>BipA)      | bipA            | 16 | 2  | 0 |
| C6DJG8                               | ATP synthase subunit b<br>(ATP synthase F(0) sector                                              | atpF            | 7  | 6  | 3 |

|                             |                                                                                                                                |                         |    |   |    |
|-----------------------------|--------------------------------------------------------------------------------------------------------------------------------|-------------------------|----|---|----|
|                             | subunit b) (ATPase subunit I)<br>(F-type ATPase subunit b) (F-ATPase subunit b)                                                |                         |    |   |    |
| A0A1M5GMU1                  | Oligogalacturonide ABC transporter ATP-binding protein                                                                         | SAMN05444<br>147_101218 | 12 | 2 | 0  |
| <b>periplasmic proteins</b> |                                                                                                                                |                         |    |   |    |
| A0A093RA42                  | Leucine ABC transporter substrate-binding protein                                                                              | KP22_20180              | 14 | 1 | 4  |
| A0A093T3Y9                  | Putrescine-binding periplasmic protein                                                                                         | KP22_03030              | 14 | 1 | 1  |
| A0A0J5XMS3                  | Transaldolase (EC 2.2.1.2)                                                                                                     | tal                     | 15 | 8 | 1  |
| A0A0J6AIS3                  | Histidine ABC transporter substrate-binding protein HisJ                                                                       | G033_14170              | 8  | 1 | 0  |
| A0A2T3VY27                  | Amino acid ABC transporter substrate-binding protein                                                                           | C9I36_08780             | 8  | 8 | 1  |
| A0A2T3VZ74                  | Sulfate transporter subunit                                                                                                    | C9I36_07340             | 12 | 2 | 0  |
| A0A426IUT6                  | Discoidin domain-containing protein                                                                                            | DMB83_00355             | 5  | 0 | 0  |
| A0A4U7KL34                  | Thiol peroxidase (Tpx) (EC 1.11.1.24) (Peroxiredoxin tpx) (Prx) (Thioredoxin peroxidase) (Thioredoxin-dependent peroxiredoxin) | tpx                     | 9  | 3 | 3  |
| A0A4U7KMZ0                  | Amino acid ABC transporter substrate-binding protein                                                                           | EDI29_01750             | 16 | 1 | 3  |
| A0A6I6WW15                  | Ribose ABC transporter substrate-binding protein RbsB                                                                          | rbsB                    | 17 | 0 | 13 |
| A0A6P1RNF8                  | Divisome-associated lipoprotein YraP                                                                                           | yraP                    | 6  | 3 | 1  |
| C6DAJ2                      | Chaperone protein Skp                                                                                                          | PC1_0950                | 7  | 1 | 0  |
| C6DEE1                      | Cationic amino acid ABC transporter, periplasmic binding protein                                                               | PC1_1584                | 8  | 0 | 0  |
| C6DII0                      | Superoxide dismutase (EC 1.15.1.1)                                                                                             | PC1_4160                | 16 | 4 | 1  |

|                                |                                                                    |             |    |    |    |
|--------------------------------|--------------------------------------------------------------------|-------------|----|----|----|
| C6DJU7                         | Transport-associated protein                                       | PC1_0454    | 6  | 0  | 0  |
| Q6D987                         | Putative exported protein                                          | ECA0732     | 6  | 0  | 0  |
| Q6DAF0                         | Periplasmic serine endoprotease DegP-like (EC 3.4.21.107)          | degQ        | 13 | 0  | 0  |
| A0A6I7DG12                     | Tol-Pal system protein TolB                                        | tolB        | 20 | 4  | 1  |
| A0A6I7DN17                     | Peptidyl-prolyl cis-trans isomerase                                | EH204_19595 | 13 | 4  | 4  |
| <b>outer membrane proteins</b> |                                                                    |             |    |    |    |
| A0A3A4ATX4                     | Outer membrane protein OmpW                                        | ompW        | 9  | 6  | 10 |
| A0A419B1E5                     | Porin                                                              | D5071_02990 | 6  | 5  | 5  |
| A0A4U7KDA0                     | Toxin CdiA (Fragment)                                              | EDI29_15430 | 2  | 0  | 10 |
| A0A4U7KIX7                     | MipA/OmpV family protein                                           | EDI29_02925 | 7  | 1  | 0  |
| A0A6I6X068                     | Outer membrane channel protein TolC                                | tolC        | 11 | 5  | 0  |
| A0A6P1RRG7                     | Porin                                                              | EO763_11905 | 5  | 1  | 0  |
| C6DGP0                         | Filamentous hemagglutinin family outer membrane protein            | PC1_0065    | 4  | 0  | 7  |
| C6DJB5                         | Glutamate dehydrogenase                                            | PC1_4200    | 11 | 14 | 0  |
| C6DJX9                         | Toxin CdiA                                                         | PC1_2330    | 15 | 2  | 3  |
| C6DK90                         | Major outer membrane lipoprotein Lpp                               | lpp         | 5  | 4  | 4  |
| Q6D3I0                         | Outer membrane protein                                             | ompX        | 9  | 5  | 3  |
| Q6D7F1                         | Peptidoglycan-associated protein                                   | pal         | 12 | 9  | 2  |
| Q9RB08                         | Outer membrane lipoprotein Pcp                                     | pcp         | 4  | 3  | 1  |
| <b>secreted proteins</b>       |                                                                    |             |    |    |    |
| A0A0J5XYH6                     | Flagellar hook-associated protein 1 (HAP1)                         | flgK        | 13 | 5  | 9  |
| A0A0J6AP95                     | Flagellar hook-associated protein 2 (HAP2) (Flagellar cap protein) | G033_08615  | 11 | 7  | 12 |

|                         |                                                                                                                                   |                     |    |    |   |
|-------------------------|-----------------------------------------------------------------------------------------------------------------------------------|---------------------|----|----|---|
| A0A0M2EXB4              | Hemagglutinin (Fragment)                                                                                                          | KU74_20835          | 5  | 3  | 2 |
| A0A1D7Z539              | Endonuclease (EC 3.1.30.-)                                                                                                        | A7983_16615         | 3  | 7  | 0 |
| A0A1V2QYZ8              | Flagellin (Fragment)                                                                                                              | BSK71_20225         | 6  | 4  | 2 |
| A0A433NE21              | Uncharacterized protein                                                                                                           | F126LOC_01413       | 14 | 5  | 1 |
| A0A6I6XCX0              | Ig-like domain-containing protein                                                                                                 | GT391_13040         | 24 | 5  | 2 |
| C6DBM0                  | von Willebrand factor type A                                                                                                      | PC1_3060            | 18 | 5  | 3 |
| Q6D7Y9                  | F5/8 type C domain-containing protein                                                                                             | ECA1186             | 2  | 9  | 0 |
| Q6D880                  | Endo-polygalacturonase (EC 3.2.1.15)                                                                                              | pehA                | 13 | 4  | 9 |
| A0A1M5PFU6              | Flagellin                                                                                                                         | SAMN05444147_105355 | 19 | 12 | 8 |
| A0A1M5PGH7              | Flagellin                                                                                                                         | SAMN05444147_105354 | 18 | 11 | 9 |
| A0A6I7D9X8              | Flagellar hook protein FlgE                                                                                                       | EH204_07515         | 7  | 0  | 0 |
| <b>unknown location</b> |                                                                                                                                   |                     |    |    |   |
| A0A0J5XRG5              | Tail protein                                                                                                                      | G033_13365          | 12 | 20 | 0 |
| A0A0J5XY41              | Protein ElaB                                                                                                                      | G033_07880          | 4  | 0  | 0 |
| A0A1V2R4S2              | Dihydrolipoyl dehydrogenase (EC 1.8.1.4)                                                                                          | BSK71_10130         | 22 | 16 | 4 |
| A0A4U7KF10              | Malate dehydrogenase (EC 1.1.1.37)                                                                                                | mdh                 | 18 | 4  | 5 |
| A0A6I6X5W8              | Carbamoyl-phosphate synthase large chain (EC 6.3.5.5) (Carbamoyl-phosphate synthetase ammonia chain)                              | carB                | 22 | 4  | 0 |
| C6DF19                  | Bifunctional aspartokinase/homoserine dehydrogenase [Includes: Aspartokinase (EC 2.7.2.4); Homoserine dehydrogenase (EC 1.1.1.3)] | PC1_3668            | 13 | 17 | 0 |
| C6DFZ7                  | SmpA/OmlA domain protein                                                                                                          | PC1_1899            | 6  | 3  | 3 |



|            |                                   |                         |   |   |   |
|------------|-----------------------------------|-------------------------|---|---|---|
| Q6D6E3     | DUF3666 domain-containing protein | ECA1742                 | 8 | 5 | 2 |
| Q6D9H6     | Putative membrane protein         | ECA0639                 | 4 | 3 | 1 |
| A0A1M5MNT4 | Uncharacterized protein           | SAMN05444<br>147_104139 | 0 | 4 | 0 |

---
